# Supplementary material for: Effectiveness of Digital Education on Communication Skills Among Medical Students: Systematic Review and Meta-Analysis by the Digital Health Education Collaboration
Source: PubMed Central journal article supplement (PMC6764329; doi:10.2196/12967), 2019-08-27
Supplement: jmir_v21i8e12967_app2.pdf [file jmir_v21i8e12967_app2.pdf]

**Multimedia Appendix 2. Summary of Findings Table for the Effects of Digital Health Education on communication skills**

| <b>Digital education (online learning, virtual patient) compared with traditional</b>                |                                                                                                                    |                                                   |                                        |                                                                                                                                                                                                                                                                                                                                                                                              |
|------------------------------------------------------------------------------------------------------|--------------------------------------------------------------------------------------------------------------------|---------------------------------------------------|----------------------------------------|----------------------------------------------------------------------------------------------------------------------------------------------------------------------------------------------------------------------------------------------------------------------------------------------------------------------------------------------------------------------------------------------|
| <b>Patient or population:</b> first, second, third and/or fourth year undergraduate medical students |                                                                                                                    |                                                   |                                        |                                                                                                                                                                                                                                                                                                                                                                                              |
| <b>Settings:</b> Universities                                                                        |                                                                                                                    |                                                   |                                        |                                                                                                                                                                                                                                                                                                                                                                                              |
| <b>Intervention:</b> Digital education (online digital education, VP simulation)                     |                                                                                                                    |                                                   |                                        |                                                                                                                                                                                                                                                                                                                                                                                              |
| <b>Comparison:</b> Traditional learning                                                              |                                                                                                                    |                                                   |                                        |                                                                                                                                                                                                                                                                                                                                                                                              |
| <b>Outcomes</b>                                                                                      | <b>Illustrative comparative risks (95% CI)</b>                                                                     | <b>Number of participants (number of studies)</b> | <b>Quality of the evidence (GRADE)</b> | <b>Comments</b>                                                                                                                                                                                                                                                                                                                                                                              |
| <b>Skills</b> (measured with surveys, checklist, Likert scales, OSCE)                                | The mean skills score in digital education groups was -0.19 standard deviations lower (-0.9 lower to 0.52 higher). | 472 students<br>(4 studies)                       | ⊕⊕⊖⊖<br>low <sup>a,b</sup>             | The standard deviations was derived from a SMD of -0.19 (95% CI: -0.9 to 0.52) which indicates a small effect size. The result of one study (168 participants) was not added to the meta-analysis due to incomplete outcome data. However, the study authors reported improved effectiveness in postintervention skills with online digital education compared to traditional learning [30]. |
| <b>Knowledge</b>                                                                                     | No studies reported knowledge outcome.                                                                             |                                                   |                                        |                                                                                                                                                                                                                                                                                                                                                                                              |

|                                                                                                                                                                                                                                                                                                                                                                                                                                                                                                                                                                                                                                                                |                                              |
|----------------------------------------------------------------------------------------------------------------------------------------------------------------------------------------------------------------------------------------------------------------------------------------------------------------------------------------------------------------------------------------------------------------------------------------------------------------------------------------------------------------------------------------------------------------------------------------------------------------------------------------------------------------|----------------------------------------------|
| <b>Attitude</b>                                                                                                                                                                                                                                                                                                                                                                                                                                                                                                                                                                                                                                                | No studies reported attitude outcome.        |
| <b>Satisfaction</b>                                                                                                                                                                                                                                                                                                                                                                                                                                                                                                                                                                                                                                            | No studies reported satisfaction outcome.    |
| <b>Patient-related outcome</b>                                                                                                                                                                                                                                                                                                                                                                                                                                                                                                                                                                                                                                 | No studies reported patient-related outcome. |
| <b>Adverse outcome</b>                                                                                                                                                                                                                                                                                                                                                                                                                                                                                                                                                                                                                                         | No studies reported adverse events.          |
| <b>Economic evaluation</b>                                                                                                                                                                                                                                                                                                                                                                                                                                                                                                                                                                                                                                     | No studies reported economic evaluation.     |
| <p>OSCE-objective structured clinical examination; VP- virtual patient.</p> <p>GRADE Working Group grades of evidence</p> <p><b>High quality:</b> further research is very unlikely to change our confidence in the estimate of effect.</p> <p><b>Moderate quality:</b> further research is likely to have an important impact on our confidence in the estimate of effect and may change the estimate.</p> <p><b>Low quality:</b> further research is very likely to have an important impact on our confidence in the estimate of effect and is likely to change the estimate.</p> <p><b>Very low quality:</b> we are very uncertain about the estimate.</p> |                                              |

**Table 2 Legend:**

<sup>a</sup> Downgraded by one level for study limitations: the risk of bias was unclear or high in most included studies.

<sup>b</sup> Downgraded by one level for inconsistency: the heterogeneity between studies was high with a lack of overlap among confidence intervals.
