# Supplementary material for: Effectiveness of Digital Education on Communication Skills Among Medical Students: Systematic Review and Meta-Analysis by the Digital Health Education Collaboration
Source: PubMed Central journal article supplement (PMC6764329; doi:10.2196/12967), 2019-08-27
Supplement: jmir_v21i8e12967_app4.pdf [file jmir_v21i8e12967_app4.pdf]

**Multimedia Appendix 4. Summary of Findings Table for the Effects of Digital Education (more interactive) compared to Digital Education (less interactive) on communication skills**

| <b>Digital education (more interactive) vs digital education (less interactive)</b>                            |                                                                                                         |                                                   |                                        |                                                                                                                                                                                 |
|----------------------------------------------------------------------------------------------------------------|---------------------------------------------------------------------------------------------------------|---------------------------------------------------|----------------------------------------|---------------------------------------------------------------------------------------------------------------------------------------------------------------------------------|
| <b>Patient or population:</b> second or third year undergraduate medical students                              |                                                                                                         |                                                   |                                        |                                                                                                                                                                                 |
| <b>Settings:</b> Universities                                                                                  |                                                                                                         |                                                   |                                        |                                                                                                                                                                                 |
| <b>Intervention:</b> digital education (more interactive forms: VP simulations and online multimedia modules ) |                                                                                                         |                                                   |                                        |                                                                                                                                                                                 |
| <b>Comparison:</b> digital education (less interactive forms: online classic modules, problem solving VP)      |                                                                                                         |                                                   |                                        |                                                                                                                                                                                 |
| <b>Outcomes</b>                                                                                                | <b>Illustrative comparative risks (95% CI)</b>                                                          | <b>Number of participants (number of studies)</b> | <b>Quality of the evidence (GRADE)</b> | <b>Comments</b>                                                                                                                                                                 |
| <b>Skills</b> (measured with checklist, Likert scales, OSCE) (postintervention)                                | The mean skills score in blended digital education groups was 0.12 higher (-0.09 lower to 0.33 higher). | 864 students (4 studies)                          | ⊕⊕⊕⊖<br>moderate <sup>a</sup>          | The standard deviations was derived from a SMD of 0.12 (95% CI: -0.09 to 0.33) which indicates no difference between the two groups.                                            |
| <b>Attitude</b> (measured with survey) (postintervention)                                                      | Not estimable                                                                                           | 421 students (1 study)                            | ⊕⊕⊖⊖<br>low <sup>a,b</sup>             | One study [38] assessed students' attitude towards the intervention and reported moderate improvement in postintervention attitude scores with VP simulation compared to online |

|                                                                                                                                                                                                                                                                                                                                                                                                                                                                                                                                                                                                                                                                |                                              |                            |                                   |                                                                                                                                                                                 |
|----------------------------------------------------------------------------------------------------------------------------------------------------------------------------------------------------------------------------------------------------------------------------------------------------------------------------------------------------------------------------------------------------------------------------------------------------------------------------------------------------------------------------------------------------------------------------------------------------------------------------------------------------------------|----------------------------------------------|----------------------------|-----------------------------------|---------------------------------------------------------------------------------------------------------------------------------------------------------------------------------|
|                                                                                                                                                                                                                                                                                                                                                                                                                                                                                                                                                                                                                                                                |                                              |                            |                                   | module (SMD=0.71, 95% CI: 0.51 to 0.91).                                                                                                                                        |
| <b>Satisfaction</b><br>(measured with survey)<br>(postintervention)                                                                                                                                                                                                                                                                                                                                                                                                                                                                                                                                                                                            | Not estimable                                | 67 students<br>(2 studies) | ⊕⊖⊖⊖<br>very low <sup>a,b,c</sup> | One study [35] assessed students' satisfaction and reported that students' were more satisfied with online-based VP simulation compared to online-based video module (P= .007). |
| <b>Knowledge</b>                                                                                                                                                                                                                                                                                                                                                                                                                                                                                                                                                                                                                                               | No studies reported knowledge outcome.       |                            |                                   |                                                                                                                                                                                 |
| <b>Patient-related outcome</b>                                                                                                                                                                                                                                                                                                                                                                                                                                                                                                                                                                                                                                 | No studies reported patient-related outcome. |                            |                                   |                                                                                                                                                                                 |
| <b>Adverse outcome</b>                                                                                                                                                                                                                                                                                                                                                                                                                                                                                                                                                                                                                                         | No studies reported adverse events.          |                            |                                   |                                                                                                                                                                                 |
| <b>Economic evaluation</b>                                                                                                                                                                                                                                                                                                                                                                                                                                                                                                                                                                                                                                     | No studies reported economic evaluation.     |                            |                                   |                                                                                                                                                                                 |
| <p>OSCE-objective structured clinical examination; VP- virtual patient.</p> <p>GRADE Working Group grades of evidence</p> <p><b>High quality:</b> further research is very unlikely to change our confidence in the estimate of effect.</p> <p><b>Moderate quality:</b> further research is likely to have an important impact on our confidence in the estimate of effect and may change the estimate.</p> <p><b>Low quality:</b> further research is very likely to have an important impact on our confidence in the estimate of effect and is likely to change the estimate.</p> <p><b>Very low quality:</b> we are very uncertain about the estimate.</p> |                                              |                            |                                   |                                                                                                                                                                                 |

**Table 4 Legend:**

<sup>a</sup> Downgraded by one level for study limitations: the risk of bias was unclear or high in most included studies.

<sup>b</sup> Rated down by one level for inconsistency: the heterogeneity is high with large variations in effect and lack of overlap among confidence intervals (CIs).

° Rated down by one level for imprecision: number of participants (effective sample size) in the study is less than the number of patients generated by a conventional sample size calculation for a single adequately powered trial (optimal information size)
